# Supplementary material for: Encouraging medical students to become surgeons? Impact of psychological and surgical factors on career choice at medical school
Source: PubMed Central journal article supplement (PMC11106567; doi:10.3205/zma001676), 2024-04-15
Supplement: JME-41-21-s-001.pdf [file JME-41-21-s-001.pdf]

## Attachment 1: Future specialties of choice and categories

| Specialty                      | Frequency: n = 92 |        | Category     |
|--------------------------------|-------------------|--------|--------------|
|                                | n                 | (%)    |              |
| Obstetrics and Gynecology      | 18                | (19.6) | surgical     |
| Internal medicine              | 13                | (14.1) | non-surgical |
| Anesthesiology                 | 10                | (10.9) | non-surgical |
| Pediatric medicine             | 9                 | (9.8)  | non-surgical |
| General medicine               | 7                 | (7.6)  | non-surgical |
| General surgery                | 6                 | (6.5)  | surgical     |
| Orthopedics and Trauma Surgery | 6                 | (6.5)  | surgical     |
| Psychiatry                     | 4                 | (4.3)  | non-surgical |
| Radiology                      | 3                 | (3.3)  | non-surgical |
| Urology                        | 3                 | (3.3)  | surgical     |
| Neurosurgery                   | 2                 | (2.2)  | surgical     |
| Pathology                      | 2                 | (2.2)  | non-surgical |
| Forensic medicine              | 2                 | (2.2)  | non-surgical |
| Ophthalmology                  | 1                 | (1.1)  | non-surgical |
| Plastic surgery                | 1                 | (1.1)  | surgical     |
| Ear, Nose and Throat Medicine  | 1                 | (1.1)  | surgical     |
| Dermatology and Venerology     | 1                 | (1.1)  | non-surgical |
| Neurology                      | 1                 | (1.1)  | non-surgical |
| Transfusion medicine           | 1                 | (1.1)  | non-surgical |
| Others                         | 1                 | (1.1)  | non-surgical |
